# Supplementary material for: In Situ Monitoring of Non-Thermal Plasma Cleaning of Surfactant Encapsulated Nanoparticles
Source: MDPI journal article supplement (doi:10.3390/nano14030290), 2024-01-31
Supplement: s1 [file s1]

## ***Supporting Information***

### **In Situ Monitoring of Non-Thermal Plasma Cleaning of Surfactant Encapsulated Nanoparticles**

Gengnan Li <sup>1,\*</sup>, Dmitri N. Zakharov <sup>1</sup>, Sayantani Sikder <sup>1,2</sup>, Yixin Xu <sup>1,2</sup>, Xiao Tong <sup>1</sup>, Panagiotis  
Dimitrakellis <sup>3</sup> and Jorge Anibal Boscoboinik <sup>1,\*</sup>

<sup>1</sup> Center for Functional Nanomaterials, Brookhaven National Laboratory, Upton, New York 11973, United States

<sup>2</sup> Department of Materials Science and Chemical Engineering, Stony Brook University, Stony Brook, New York  
11790, United States

<sup>3</sup> Catalysis Center for Energy Innovation, University of Delaware, Newark, Delaware 19716, United States;  
Department of Chemical and Biomolecular Engineering, University of Delaware, Newark, Delaware 19716, United  
States

\*Corresponding author: G. Li (gli2@bnl.gov); J.A. Boscoboinik (E-mail: jboscoboinik@bnl.gov)

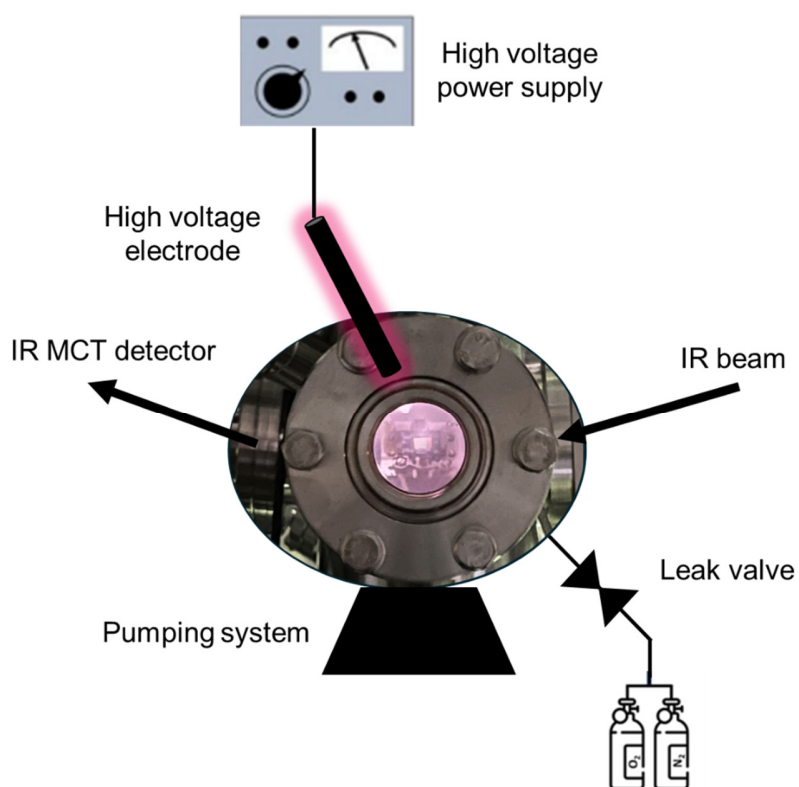

**Scheme S1.** Plasma setup in IRRAS.

### Ex situ UV-ozone treatment

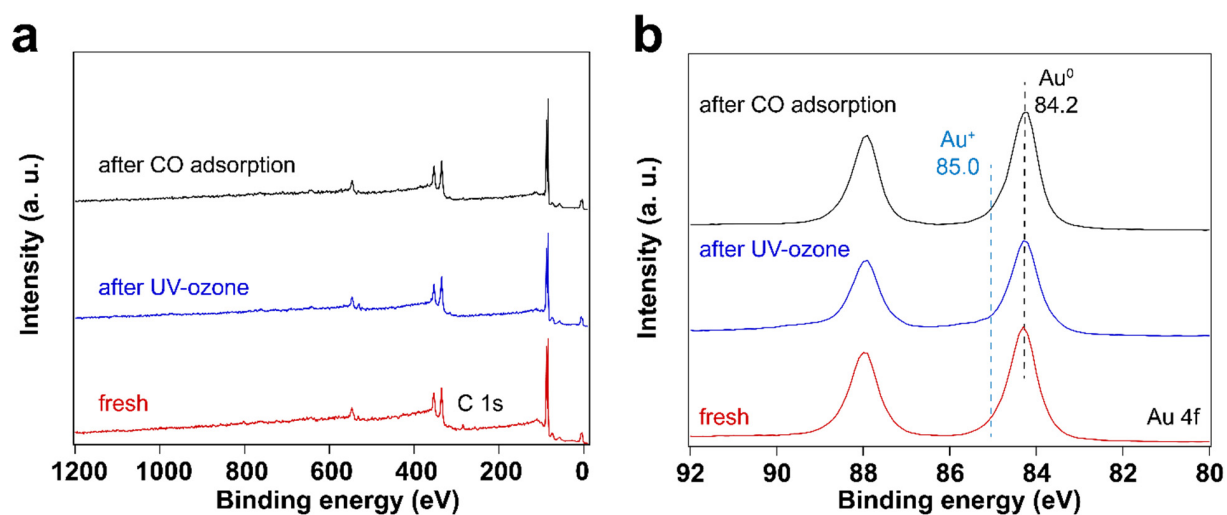

**Figure S1.** (a) Survey spectra and (b) Au 4f XP spectra of surfactant encapsulated Pt nanoparticles before and after UV-ozone treatment and after in situ CO adsorption experiment.

**Table S1.** Surface composition of Pt nanoparticles deposited on Au film derived from high-resolution XPS spectra.

| Area ratio                     | C1s/Au4f | O1s/Au4f | N1s/Pt4f | Pt4f/Au4f |
|--------------------------------|----------|----------|----------|-----------|
| Fresh sample                   | 0.83     | 0.27     | 0.17     | 0.08      |
| After UV-ozone treatment       | 0.12     | 0.35     | -        | 0.09      |
| After CO adsorption experiment | 0.02     | 0.13     | -        | 0.05      |

**In situ CO adsorption on Pt nanoparticles after UV-ozone treatment**

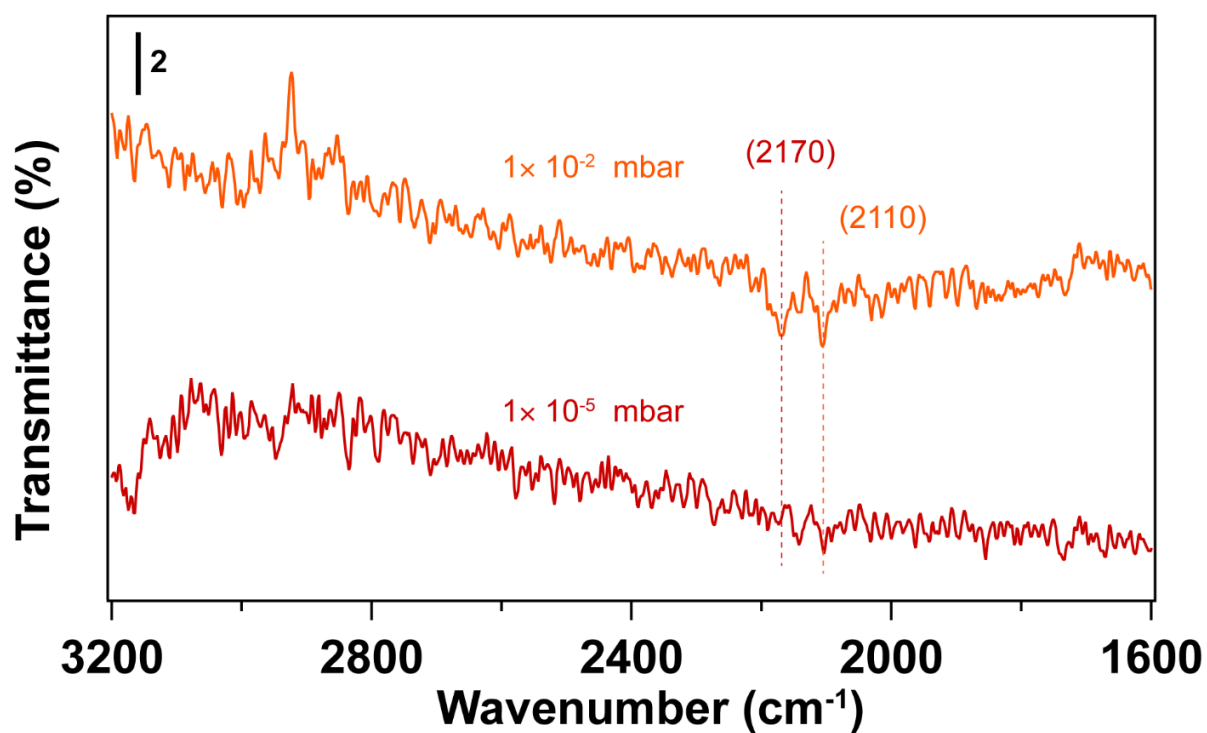

**Figure S2.** IRRAS spectra of in situ CO adsorption on surfactant encapsulated Pt nanoparticles after UV-ozone treatment. It shows CO adsorption on Pt-O sites with vibrational frequencies of 2170 and 2110 cm<sup>-1</sup>.

## In situ O<sub>2</sub> plasma treatment

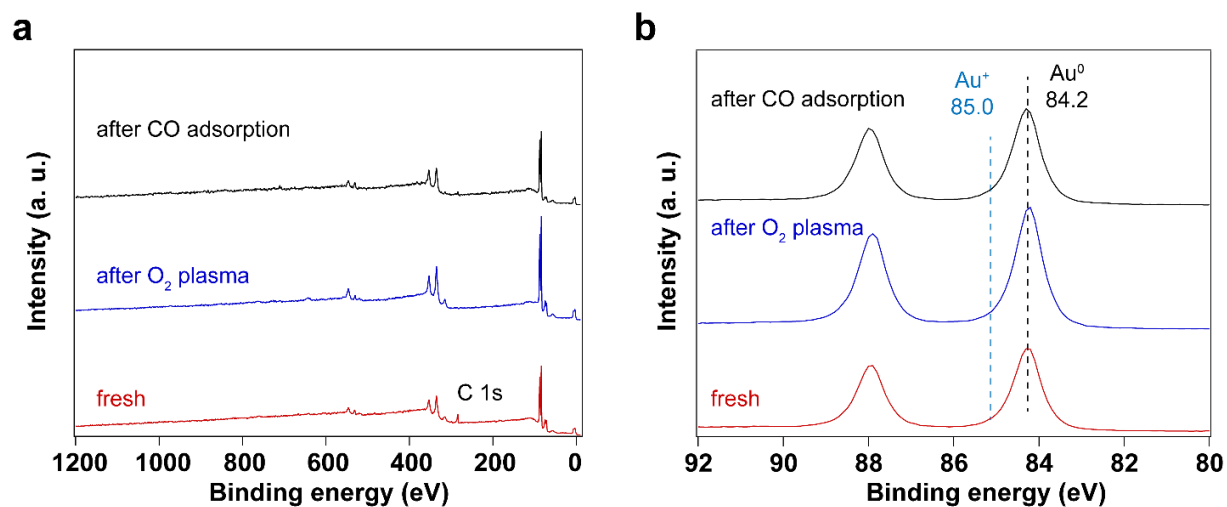

**Figure S3.** (a) Survey spectra and (b) Au 4f XP spectra of surfactant encapsulated Pt nanoparticles before and after O<sub>2</sub> plasma treatment.

**Table S2.** Surface composition of Pt nanoparticles deposited on Au film derived from high-resolution XPS spectra.

| Area ratio                            | C1s/Au4f | O1s/Au4f | N1s/Pt4f | Pt4f/Au4f |
|---------------------------------------|----------|----------|----------|-----------|
| Fresh sample                          | 1.83     | 0.50     | 0.16     | 0.30      |
| After O <sub>2</sub> plasma treatment | 0.01     | 0.29     | 0.01     | 0.25      |

## In situ H<sub>2</sub> plasma treatment

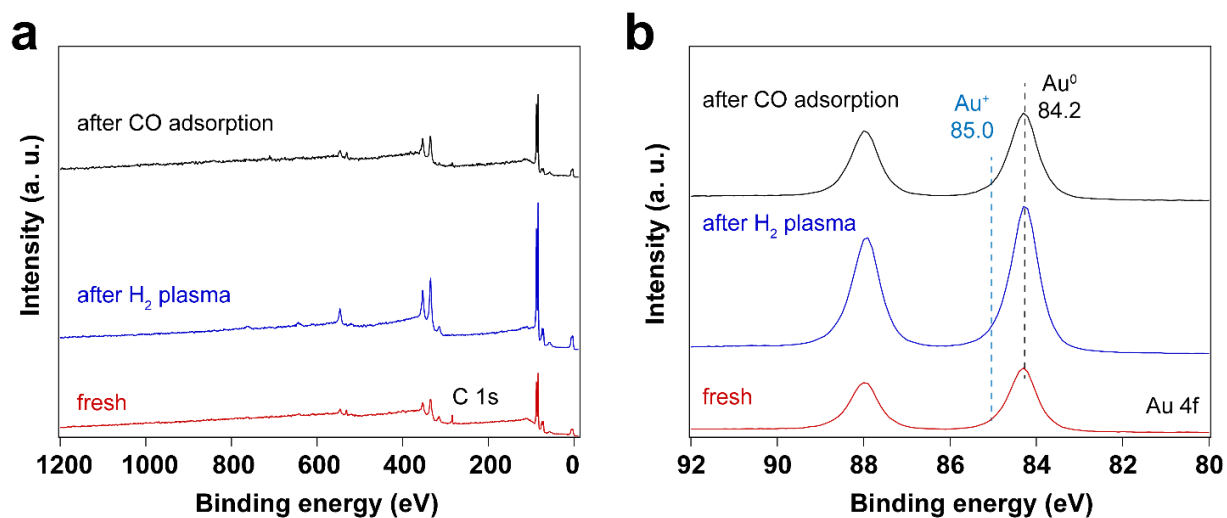

**Figure S4.** (a) Survey spectra and (b) Au 4f XP spectra of surfactant encapsulated Pt nanoparticles before and after H<sub>2</sub> plasma treatment.

**Table S3.** Surface composition of Pt nanoparticles deposited on Au film derived from high-resolution XPS spectra.

| Area ratio                            | C1s/Au4f | O1s/Au4f | N1s/Pt4f | Pt4f/Au4f |
|---------------------------------------|----------|----------|----------|-----------|
| Fresh sample                          | 2.08     | 0.52     | 0.43     | 0.31      |
| After H <sub>2</sub> plasma treatment | 0.86     | 0.06     | 0.06     | 0.18      |

**Ex situ UV-ozone treatment followed by in situ H<sub>2</sub> reduction at 100 °C**

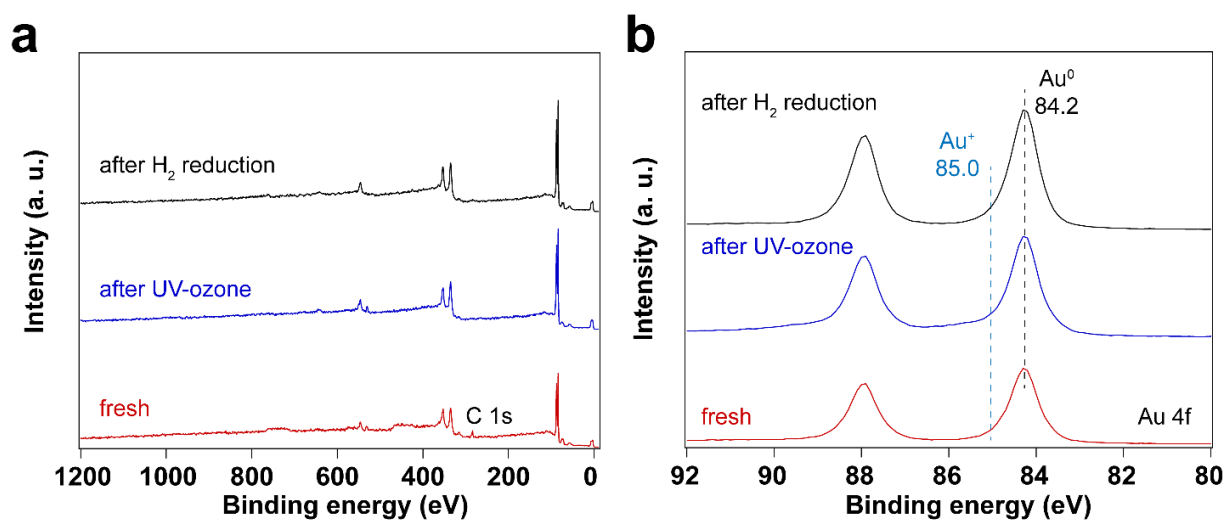

**Figure S5.** (a) Survey spectra and (b) Au 4f XP spectra of surfactant encapsulated Pt nanoparticles before and after UV-ozone and H<sub>2</sub> plasma treatment.

**Table S4.** Surface composition of Pt nanoparticles deposited on Au film derived from high-resolution XPS spectra.

| Area ratio                     | C1s/Au4f | O1s/Au4f | N1s/Pt4f | Pt4f/Au4f |
|--------------------------------|----------|----------|----------|-----------|
| Fresh sample                   | 1.25     | 0.37     | 0.17     | 0.11      |
| After UV-ozone treatment       | 0.13     | 0.30     | -        | 0.07      |
| After H <sub>2</sub> reduction | 0.20     | 0.06     | 0.05     | 0.07      |

### In situ O<sub>2</sub> plasma followed by H<sub>2</sub> plasma treatment

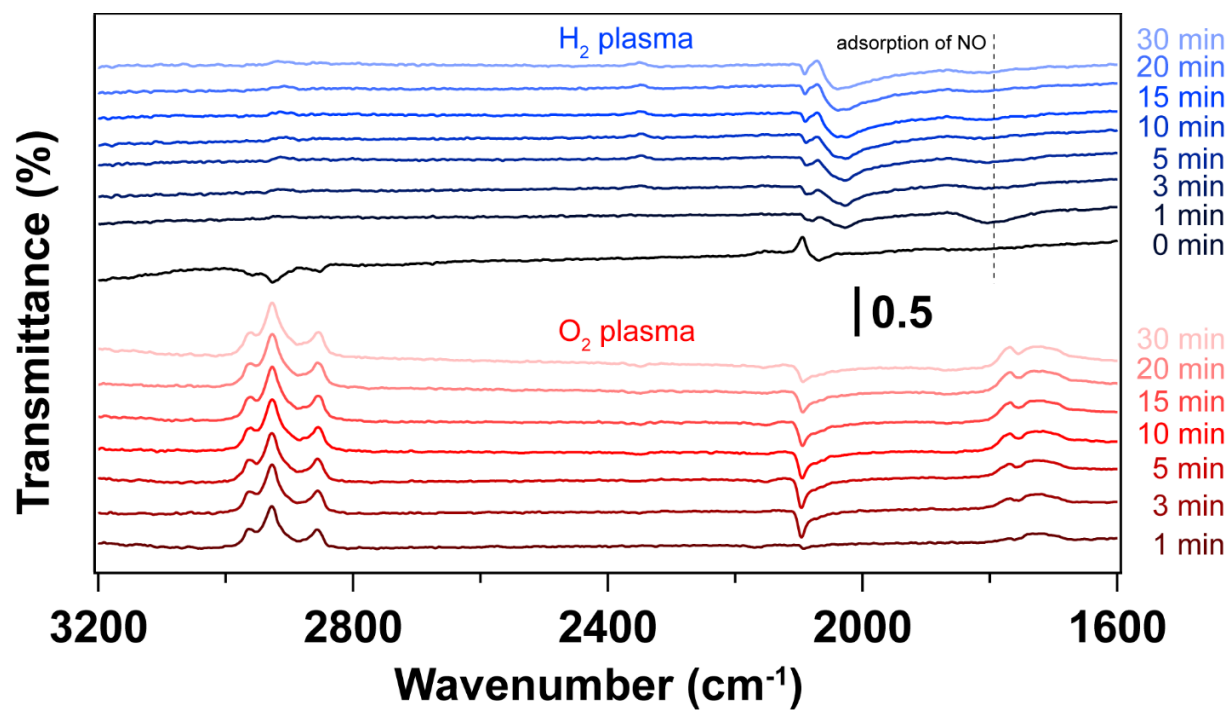

**Figure S6.** IRRAS spectra of surfactant encapsulated Pt nanoparticles by sequential O<sub>2</sub>-H<sub>2</sub> plasma treatment. The pressure of O<sub>2</sub> or H<sub>2</sub> was 0.1 mbar, power applied for plasma treatment was 4 W.

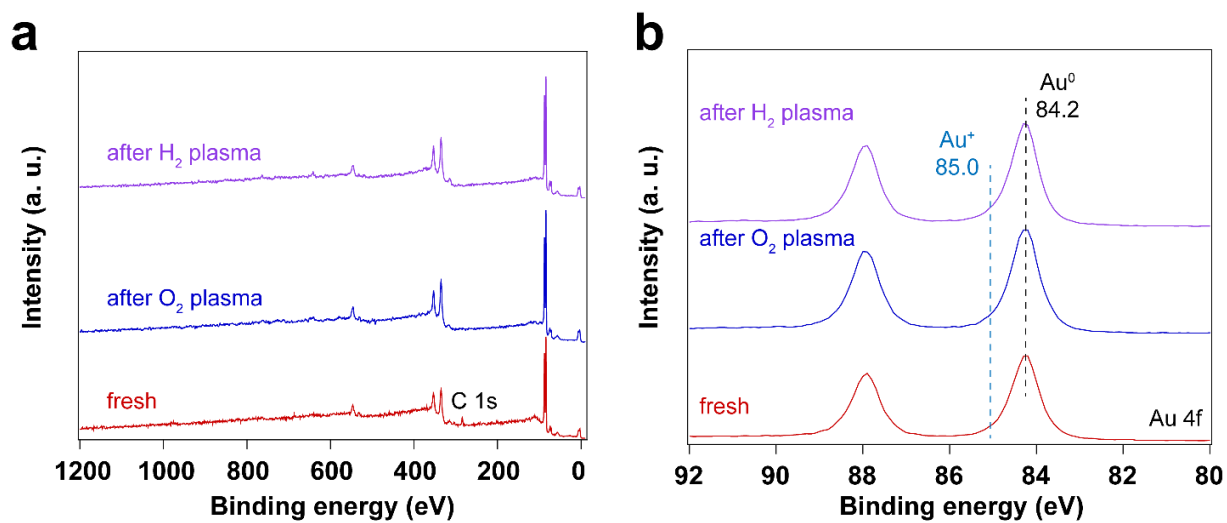

**Figure S7.** (a) Survey spectra and (b) Au 4f XP spectra of surfactant encapsulated Pt nanoparticles before and after O<sub>2</sub> and H<sub>2</sub> plasma treatment.

**Table S5.** Surface composition of Pt nanoparticles deposited on Au film derived from high-resolution XPS spectra.

| Area ratio                            | C1s/Au4f | O1s/Au4f | N1s/Pt4f | Pt4f/Au4f |
|---------------------------------------|----------|----------|----------|-----------|
| Fresh sample                          | 1.33     | 0.26     | 0.14     | 0.08      |
| After O <sub>2</sub> plasma treatment | 0.03     | 0.26     | -        | 0.11      |
| After H <sub>2</sub> plasma treatment | 0.07     | 0.12     | -        | 0.16      |



### Scanning electron microscopy analysis of Pt nanoparticles on Au substrate

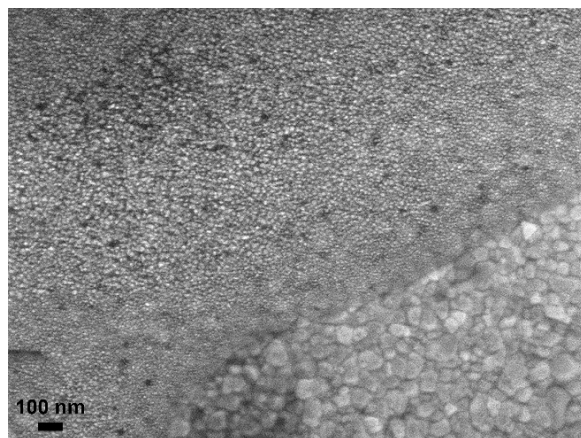

**Figure S8.** SEM image of fresh surfactant encapsulated Pt nanoparticles on Au film.

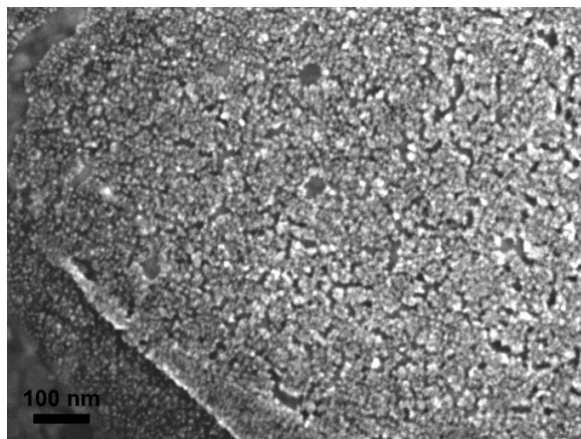

**Figure S9.** SEM image of surfactant encapsulated Pt nanoparticles on Au film after UV-ozone treatment.

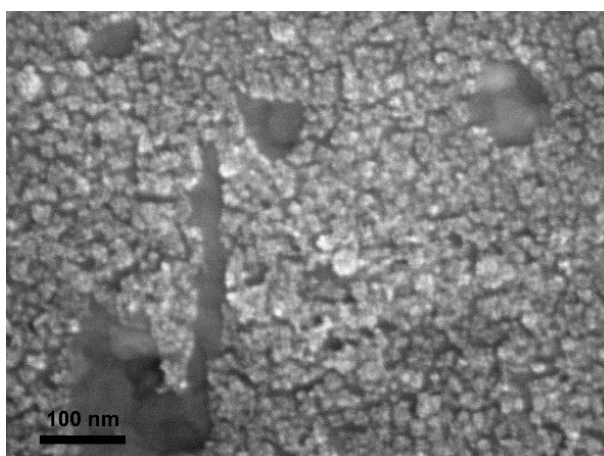

**Figure S10.** SEM image of surfactant encapsulated Pt nanoparticles on Au film after UV-ozone treatment followed by H<sub>2</sub> reduction at 100 °C.

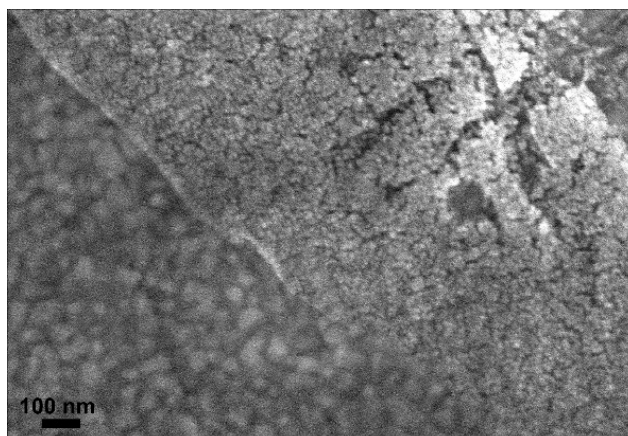

**Figure S11.** SEM image of surfactant encapsulated Pt nanoparticles on Au film after O<sub>2</sub> plasma treatment.

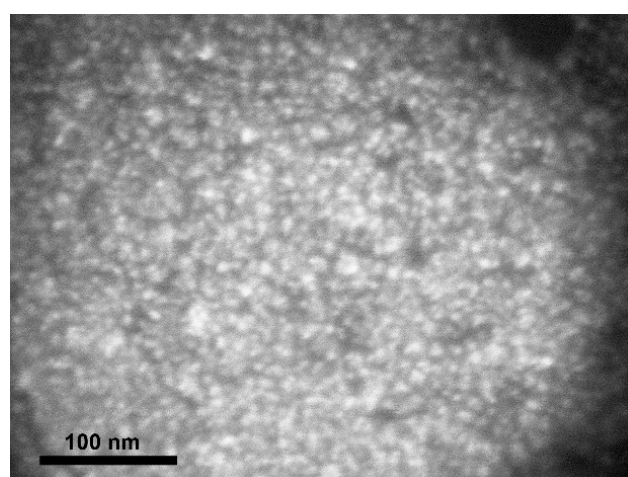

**Figure S12.** SEM image of surfactant encapsulated Pt nanoparticles on Au film after H<sub>2</sub> plasma treatment.

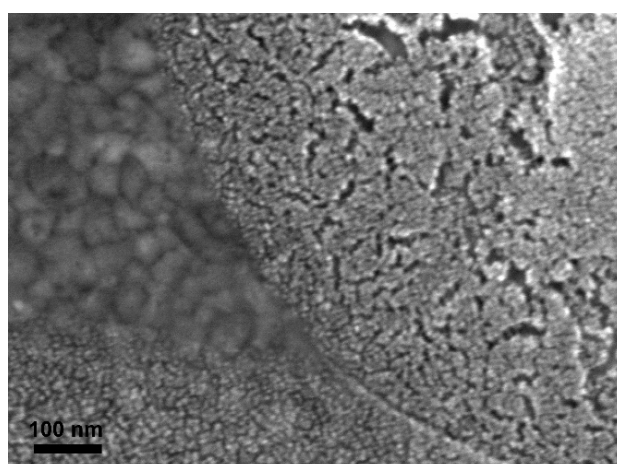

**Figure S13.** SEM image of surfactant encapsulated Pt nanoparticles on Au film after O<sub>2</sub> plasma treatment followed by H<sub>2</sub> plasma treatment.

### Atomic force microscopy analysis of Pt nanoparticles on Au substrate

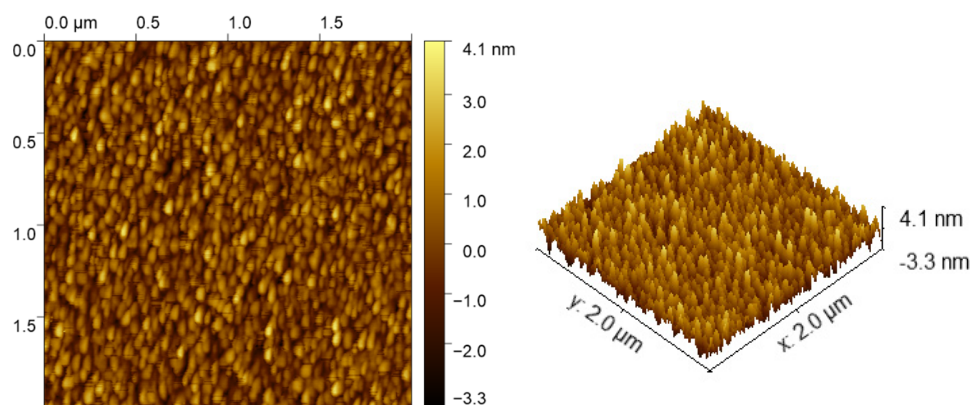

**Figure S14.** Atomic force microscopy (AFM) image of Au substrate.

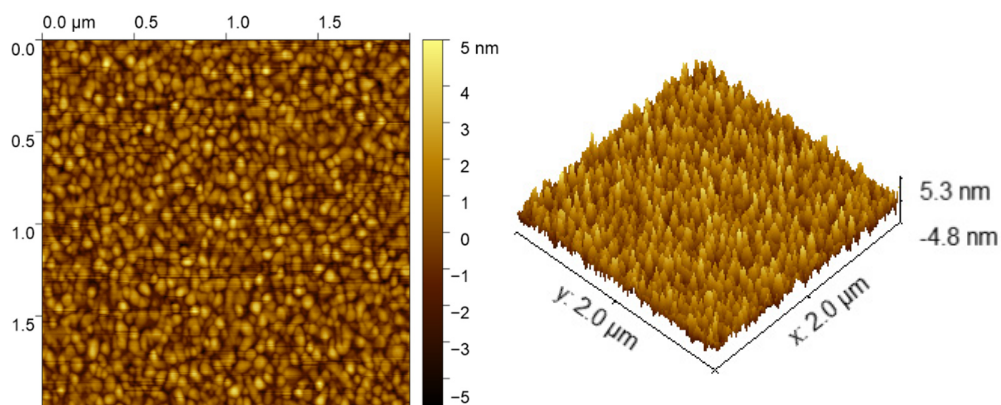

**Figure S15.** Atomic force microscopy (AFM) image of surfactant encapsulated Pt nanoparticles on Au substrate.

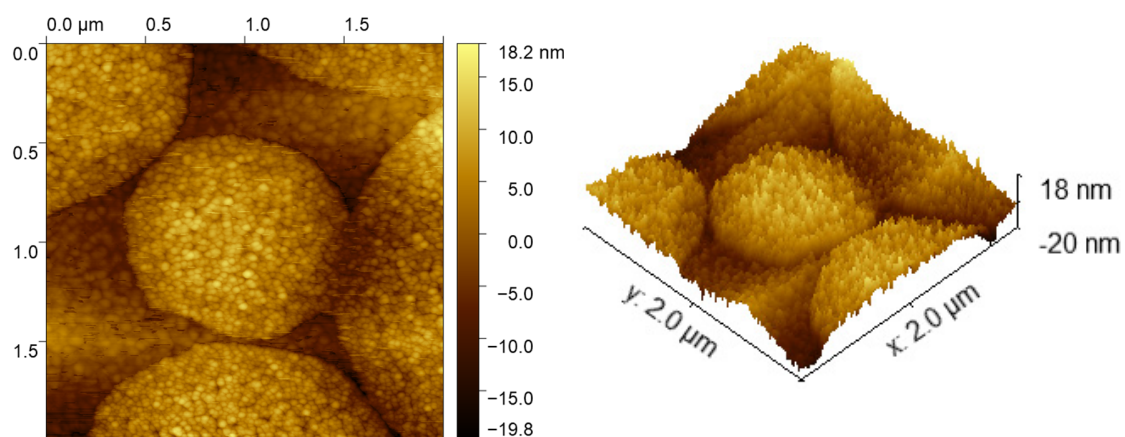

**Figure S16.** Atomic force microscopy (AFM) image of surfactant encapsulated Pt nanoparticles on Au substrate after thermal treatment under  $\text{O}_2$ .

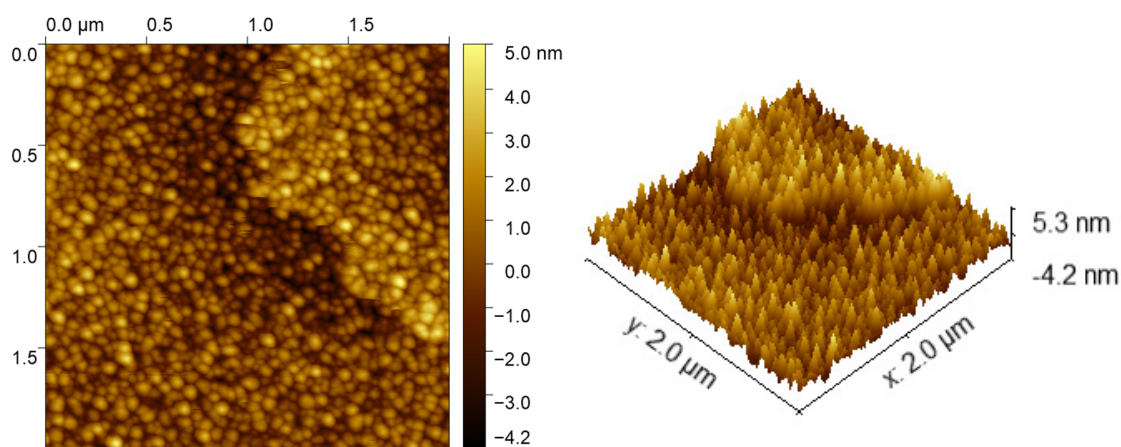

**Figure S17.** Atomic force microscopy (AFM) image of surfactant encapsulated Pt nanoparticles on Au substrate after  $\text{H}_2$  plasma treatment.

### In situ CO adsorption on surfactant encapsulated Pt nanoparticles

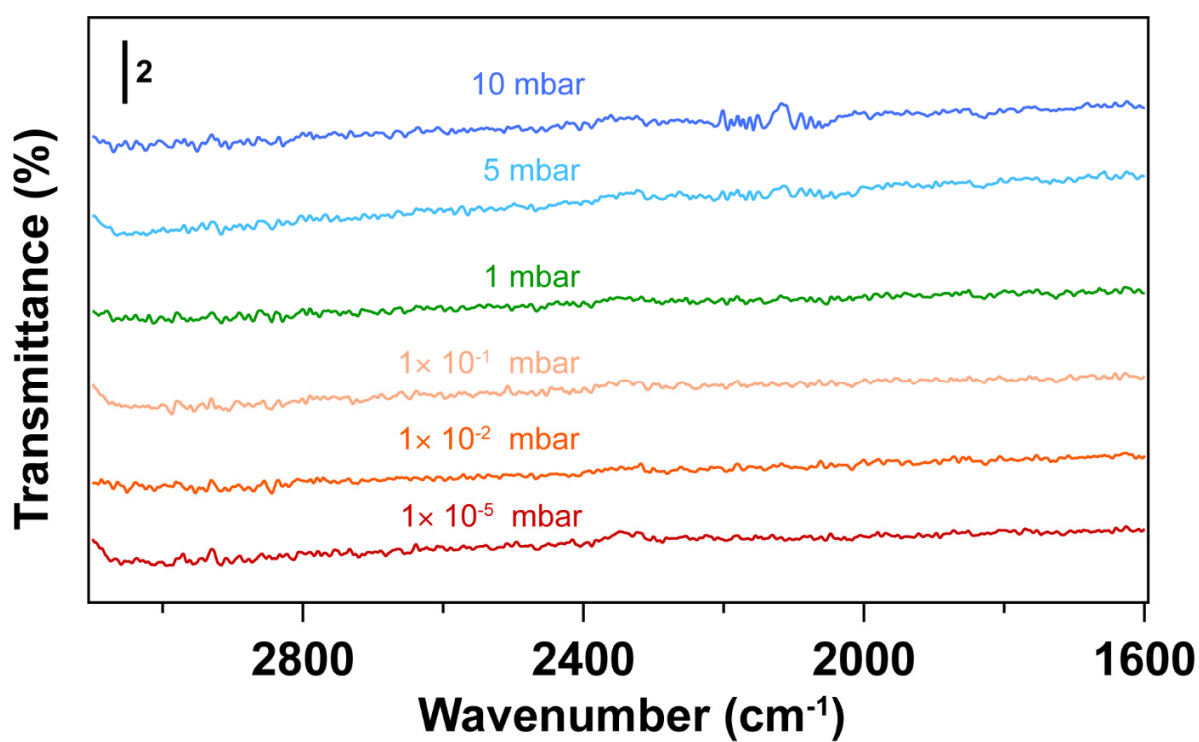

**Figure S18.** IRRA spectra of in situ CO adsorption on surfactant encapsulated Pt nanoparticles.

## Optical emission spectroscopy (OES) in H<sub>2</sub> plasma

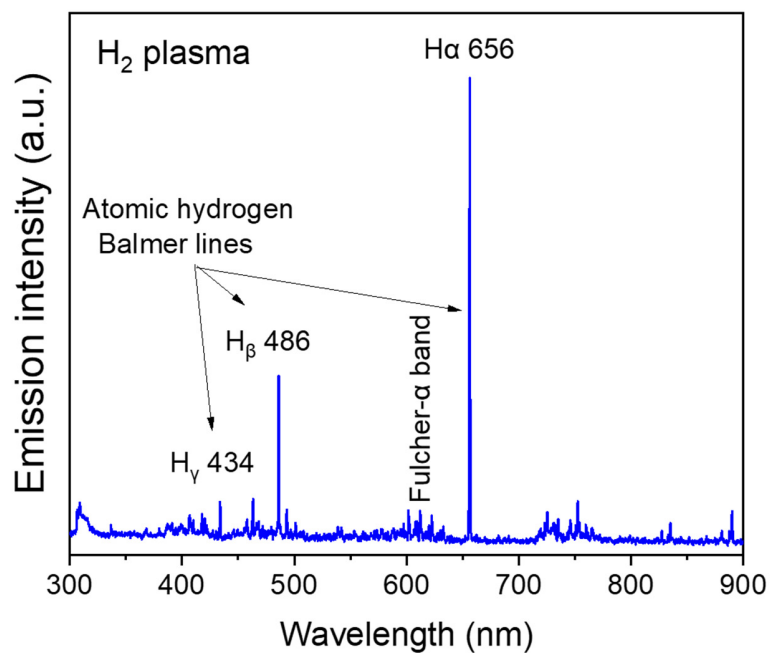

**Figure S19.** Optical emission spectrum of H<sub>2</sub> plasma used for the removal of surfactants from Pt nanoparticles. The atomic H Balmer lines as well as the Fulcher- $\alpha$  band are dominating the emission spectrum.[1]

[1] N. Škoro, N. Puač, S. Lazović, U. Cvelbar, G. Kokkoris, E. Gogolides, Characterization and global modelling of low-pressure hydrogen-based RF plasmas suitable for surface cleaning processes, *Journal of Physics D: Applied Physics*, 46 (2013) 475206.
