# Supplementary material for: In Situ Monitoring of Non-Thermal Plasma Cleaning of Surfactant Encapsulated Nanoparticles
Source: Nanomaterials (Basel). 2024 Jan 31;14(3):290. doi: 10.3390/nano14030290 (PMC10856489; doi:10.3390/nano14030290)
Supplement: Supplementary file 1 [file nanomaterials-14-00290-s001.zip]

Archive with 4 entries (4 files):
- movie S1.mp4
- movie S2.mp4
- Movie S3.mp4
- Supplementary material.pdf
